# Supplementary material for: Negative Pressure Wound Therapy with Instillation for Periprosthetic Infection after Breast Reconstruction: A Systematic Review
Source: PubMed Central journal article supplement — Plast Reconstr Surg Glob Open. 2024 Nov 5;12(11):e6267. doi: 10.1097/GOX.0000000000006267 (PMC11537567; doi:10.1097/gox.0000000000006267), 2024-11-05
Supplement: gox-12-e6267-s001.pdf [file gox-12-e6267-s001.pdf]

**Supplemental Digital Content 1. Characteristics of Included Studies.**

|                                                         | Antognoli <sup>10</sup> | Cheong <sup>11</sup> | Gruener <sup>5</sup> | Haque <sup>12</sup>                      | Meybodi <sup>13</sup> | Meybodi <sup>6</sup>  |
|---------------------------------------------------------|-------------------------|----------------------|----------------------|------------------------------------------|-----------------------|-----------------------|
| Year                                                    | 2021                    | 2016                 | 2022                 | 2021                                     | 2017                  | 2021                  |
| Country                                                 | United States           | Australia            | Germany              | United Kingdom                           | Australia             | Australia             |
| Study Type                                              | Retrospective           | Case Series          | Retrospective        | Retrospective                            | Case Series           | Prospective<br>Cohort |
| Patients (Breasts)                                      |                         |                      |                      |                                          |                       |                       |
| NPWTi-d (N)                                             | 16 (17)                 | 5 (6)                | 12 (13)              | 20 (20)                                  | 5 (6)                 | 28 (30)               |
| Control group (C)                                       | 9 (10) <sup>a</sup>     | 0 (0)                | 0 (0)                | 20 (20)                                  | 0 (0)                 | 0 (0)                 |
| Age (years), mean, (range) or $\pm$ SD                  | 47 (35-65)              | 44 (36-57)           | 49 (24-94)           | N: 47.3 $\pm$ 13.7<br>C: 57.9 $\pm$ 11.0 | 45 (41-48)            | 43 (34-57)            |
| Prosthesis Type, n (%)                                  |                         |                      |                      |                                          |                       |                       |
| Implants                                                | 7 (41)                  | 4 (67)               | 13 (100)             | N: 20; C: 20 (100)                       | 2 (33)                | 17 (57)               |
| Tissue Expanders                                        | 10 (59)                 | 2 (33)               | 0 (0)                | 0 (0)                                    | 4 (66)                | 13 (43)               |
| Breasts receiving radiation, n (%)                      | 4 (24)                  | 3 (50)               | 5 (39)               | NR                                       | 0 (0)                 | 2 (7)                 |
| Time from surgery to infection (days),<br>mean (median) | 54.8 (30.5)             | 112.6 (60)           | 253.4 (56)           | NR                                       | 37.5 (22)             | 49.5 (23)             |
| Pocket bacterial burden, ICM scale, mean<br>$\pm$ SD    | NR                      | NR                   | 1.92 $\pm$ 1.32      | NR                                       | NR                    | NR                    |
| Infection Type, n (%)                                   |                         |                      |                      |                                          |                       |                       |
| MSSA                                                    | 5 (29)                  | 2 (40)               | $\geq$ 1             | NR                                       | 2 (33)                | 9 (30)                |
| MRSA                                                    | 1 (6)                   | 0 (0)                | $\geq$ 1             | NR                                       | 0 (0)                 | 2 (7)                 |

|                                                      |                                               |        |                                                                                   |                                              |                                                        |                                              |
|------------------------------------------------------|-----------------------------------------------|--------|-----------------------------------------------------------------------------------|----------------------------------------------|--------------------------------------------------------|----------------------------------------------|
| <i>Pseudomonas aeruginosa</i>                        | 3 (18)                                        | 0 (0)  | 0 (0)                                                                             | NR                                           | 1 (17)                                                 | 2 (7)                                        |
| <i>Serratia marcesens</i>                            | 2 (12)                                        | 1 (20) | ≥1                                                                                | NR                                           | 0 (0)                                                  | 4 (13)                                       |
| Other                                                | 4 (23)                                        | 1 (20) | ≥5                                                                                | NR                                           | 2 (33)                                                 | 9 (30)                                       |
| No growth                                            | 1 (6)                                         | 1 (20) | 2 (15)                                                                            | NR                                           | 1 (17)                                                 | 1 (3)                                        |
| Unknown                                              | 1 (6)                                         | 0 (0)  | 0 (0)                                                                             | NR                                           | 0 (0)                                                  | 3 (10)                                       |
| <b>Inflammatory markers at presentation</b>          |                                               |        |                                                                                   |                                              |                                                        |                                              |
| C-reactive protein levels (mL/L) mean (range) / ± SD | NR                                            | NR     | 55.3 (0-200)                                                                      | N: 2.70 ± 1.70<br>C: 1.15 ± 1.22<br>P = 0.02 | NR                                                     | 75 (2-380)                                   |
| Leukocytes/WBC, µL                                   | NR                                            | NR     | 8.16 (3.13 -10.17)                                                                | NR                                           | NR                                                     | 9 (1.8-24.7)                                 |
| <b>Antibiotic Use</b>                                |                                               |        |                                                                                   |                                              |                                                        |                                              |
| Type                                                 | IV broad spectrum, narrowed based on cultures | IV     | IV, cephalosporin + antibiotic for aerobic infections, adjusted based on cultures | IV                                           | IV guided by microbiological sensitivities             | IV individualized by Infectious Disease Unit |
| Timing                                               | On admission for infection                    | NR     | Explantation of infected prosthesis until 5 days post-closure                     | NR                                           | Explantation of infected prosthesis until re-insertion | On admission for infection                   |

|                    |                                                                                                                                                                                                                     |                                                                                                                                |                                            |                                                              |                                                                                                                                                            |                                                                                                                                                            |
|--------------------|---------------------------------------------------------------------------------------------------------------------------------------------------------------------------------------------------------------------|--------------------------------------------------------------------------------------------------------------------------------|--------------------------------------------|--------------------------------------------------------------|------------------------------------------------------------------------------------------------------------------------------------------------------------|------------------------------------------------------------------------------------------------------------------------------------------------------------|
| Outpatient         | Oral (N=14) or IV (N=2) for ≤14 days as indicated by medical/infectious disease team                                                                                                                                | NR                                                                                                                             | NR                                         | NR                                                           | NR                                                                                                                                                         | ≥3 weeks of oral antibiotics after discharge                                                                                                               |
| Surgical Technique | Prostheses<br>Explantation followed by debridement/wash out. Capsule abraded with a Bovie scratch pad to remove biofilm and irrigated. Nonintegrated biologic mesh and necrotic tissue removed then NPWTi-d placed. | Prostheses<br>Explantation and washout. Cavity packed with rolls of sterile foam. NPWTi-d used for irrigation and maintenance. | Prostheses<br>Explantation and irrigation. | Prostheses<br>Explantation followed by debridement/wash out. | Prostheses<br>Explantation followed by debridement/curettage to healthy tissue. Pocket washed with Betadine and normal saline prior to NPWTi-d application | Prostheses<br>Explantation followed by debridement/curettage to healthy tissue. Pocket washed with Betadine and normal saline prior to NPWTi-d application |
| NPWTi-d Settings   |                                                                                                                                                                                                                     |                                                                                                                                |                                            |                                                              |                                                                                                                                                            |                                                                                                                                                            |
| Solution           |                                                                                                                                                                                                                     |                                                                                                                                |                                            |                                                              |                                                                                                                                                            |                                                                                                                                                            |

|                                        |                                  |                                                 |                                                                                     |                                                                                    |                                                  |                                            |
|----------------------------------------|----------------------------------|-------------------------------------------------|-------------------------------------------------------------------------------------|------------------------------------------------------------------------------------|--------------------------------------------------|--------------------------------------------|
| Saline                                 | 0 (0)                            | 6 (100)                                         | 0 (0)                                                                               | N: 20 C:20 (100)                                                                   | 4 (66)                                           | 11 (37)                                    |
| Acetic Acid                            | 0 (0)                            | 0 (0)                                           | 0 (0)                                                                               | 0 (0)                                                                              | 1 (17)                                           | 4 (13)                                     |
| Polyhexadine                           | 0 (0)                            | 0 (0)                                           | 13 (100)                                                                            | 0 (0)                                                                              | 0 (0)                                            | 0 (0)                                      |
| Prontosan                              | 17 (100)                         | 0 (0)                                           | 0 (0)                                                                               | 0 (0)                                                                              | 1 (17)                                           | 2 (7)                                      |
| Unknown                                | 0 (0)                            | 0 (0)                                           | 0 (0)                                                                               | 0 (0)                                                                              | 0 (0)                                            | 13 (43)                                    |
| Volume (mL)                            | 80-400                           | NR                                              | NR                                                                                  | NR                                                                                 | 100-150                                          | 100-150                                    |
| Frequency (hrs)                        | 1-4                              | 1                                               | 0.5                                                                                 | NR                                                                                 | 3.5                                              | 3.5                                        |
| Dwell time (min)                       | 10-20                            | 15                                              | 20                                                                                  | NR                                                                                 | 15                                               | 15                                         |
| Pressure (mmHg)                        | -125                             | -75                                             | -125                                                                                | NR                                                                                 | -125                                             | -125                                       |
| Duration of therapy (days)             | 1-4                              | ≤7                                              | 2-3.5                                                                               | 2-3                                                                                | NR                                               | NR                                         |
| Dressing Change Interval (days)        | No Changes                       | 2                                               | 3-5                                                                                 | NR                                                                                 | 3                                                | 3                                          |
| Criteria for reinsertion of prosthesis | Surgeon preference + OR schedule | Clean wound cavity + healthy granulation tissue | Resolution of redness, pain, swelling + decreased CRP + leukocytes + absence of pus | Clean and healthy wound cavity + improved inflammatory markers + negative cultures | Healthy granulation tissue + ≥1 negative culture | Pink granulation tissue + negative culture |

|                                                   |           |    |          |    |          |      |
|---------------------------------------------------|-----------|----|----------|----|----------|------|
| Follow-up after replant (months), mean<br>(range) | 22 (4-59) | NR | 6 (0-60) | NR | 9 (3-17) | 39.4 |
|---------------------------------------------------|-----------|----|----------|----|----------|------|

NR = not reported; N = NPWTi-d; C = Control
