# Supplementary material for: Negative Pressure Wound Therapy with Instillation for Periprosthetic Infection after Breast Reconstruction: A Systematic Review
Source: PubMed Central journal article supplement — Plast Reconstr Surg Glob Open. 2024 Nov 5;12(11):e6267. doi: 10.1097/GOX.0000000000006267 (PMC11537567; doi:10.1097/gox.0000000000006267), 2024-11-05
Supplement: gox-12-e6267-s002.pdf [file gox-12-e6267-s002.pdf]

## Supplemental Digital Content 2. Other Reported Outcome Measures.

|                                                                           | Antognoli <sup>10</sup> | Cheong <sup>11</sup> | Gruener <sup>5</sup> | Haque <sup>12</sup>                            | Meybodi <sup>13</sup> | Meybodi <sup>6</sup> |
|---------------------------------------------------------------------------|-------------------------|----------------------|----------------------|------------------------------------------------|-----------------------|----------------------|
| Pocket bacterial burden after NPWTi-d                                     |                         |                      |                      |                                                |                       |                      |
| ICM scale, mean ± SD                                                      | NR                      | NR                   | 0.76 ± 1.47          | NR                                             | NR                    | NR                   |
| Change from baseline                                                      | NR                      | NR                   | -1.16 (P = 0.002)    | NR                                             | NR                    | NR                   |
| Inflammatory markers after NPWTi-d                                        |                         |                      |                      |                                                |                       |                      |
| CRP (mL/L), mean (range)                                                  | NR                      | NR                   | 15.5 (1.8-34.8)      | NR                                             | NR                    | NR                   |
| Change from baseline                                                      | NR                      | NR                   | -39.8, P=0.0002      | NR                                             | NR                    | NR                   |
| Leukocytes (μL), mean (range)                                             | NR                      | NR                   | 5.83 (3.13-10.17)    | NR                                             | NR                    | NR                   |
| Change from baseline                                                      | NR                      | NR                   | -2.33, P=0.0002      | NR                                             | NR                    | NR                   |
| Time to negative culture (days), mean (range)                             | NR                      | NR                   | NR                   | NR                                             | NR                    | 5.2 (1-14)           |
| Time from prosthesis removal to reinsertion (days), mean (range)- or ± SD | 2.3 (1-4.9)             | ≤7                   | 8.5 (5-14)           | N: 10.3 ± 2.8<br>C: 247.5 ± 111.3<br>p < 0.001 | NR                    | NR                   |
| Return trips to the OR including removal of NPWTi-d                       | 1                       | NR                   | NR                   | N: 3.4 ± 0.8<br>C: 2.2 ± 0.4<br>p = 0.006      | 2.3 (1-4)             | 3.7 (2-7)            |
| Hospital length of stay (days), mean (range)                              | 4.4 (1-8)               | ≥7                   | 11.8 (7-16)          | N: 11.9 ± 4.1<br>C: 7.1 ± 5.8<br>p < 0.004     | 12 (7-16)             | 11.5 (6-22)          |
| Office visits, mean ± SD                                                  | I: 11 ± 5               | NR                   | NR                   | N: 12 ± 6                                      | NR                    | NR                   |

|                                        |                                                                                                                    |    |    |                                                        |                           |                                                          |
|----------------------------------------|--------------------------------------------------------------------------------------------------------------------|----|----|--------------------------------------------------------|---------------------------|----------------------------------------------------------|
|                                        | C: 24 ± 9<br>p = 0.002                                                                                             |    |    | C: 14.2 ± 6.3<br>p = 0.491                             |                           |                                                          |
| Hospitalizations                       | I: 2 ± 1<br>C: 4 ± 1<br>p = 0.002                                                                                  | NR | NR | N: 1<br>C: 2.1 ± 0.3<br>p < 0.001                      | NR                        | NR                                                       |
| Breast satisfaction (Breast-Q Scores)  | NR                                                                                                                 | NR | NR | N: 55.0 ± 14.9<br>C: 39.7 ± 20.0<br>p = 0.032          | NR                        | NR                                                       |
| Implant satisfaction (Breast-Q Scores) | NR                                                                                                                 | NR | NR | N: 6.1 ± 2.1<br>C: 4.9 ± 1.5<br>p = 0.061              | NR                        | NR                                                       |
| Complications                          | I: 2/16 patients had capsular contractures                                                                         | NR | NR | N: 0<br>C: 3 cases required flap reconstruction        | No complications reported | No record of capsular contracture or recurrent infection |
| Total Cost of Care                     | N: Modeled cost reduction of \$6475/patient through reduced office visits (-\$1391) and hospitalizations (-\$5084) | NR | NR | N: £14,343 ± £2,787<br>C: £8,920 ± £3,006<br>p < 0.001 | NR                        | NR                                                       |

NR = not reported; N = NPWTi-d; C = Control; ICM = Institute for Clinical Microbiology
